# Supplementary material for: A genome-wide association study of northwestern Europeans involves the C-type natriuretic peptide signaling pathway in the etiology of human height variation
Source: PubMed Central journal article supplement — Hum Mol Genet. 2009 Jul 1;18(18):3516–24. doi: 10.1093/hmg/ddp296 (PMC2729669; doi:10.1093/hmg/ddp296), 2009-07-01
Supplement: ddp296_1.pdf [file ddp296_1.pdf]

*Supplementary Material*

**A genome-wide association study of northwestern Europeans involves the CNP signaling pathway in the etiology of human height variation**

Karol Estrada<sup>1</sup>, Michael Krawczak<sup>2,3</sup>, Stefan Schreiber<sup>3,4</sup>, Kate van Duijn<sup>5</sup>, Lisette Stolk<sup>1,6</sup>, Joyce B.J. van Meurs<sup>1</sup>, Fan Liu<sup>5</sup>, Brenda W.J.H. Penninx<sup>7</sup>, Jan H. Smit<sup>7</sup>, Nicole Vogelzangs<sup>7</sup>, Jouke Jan Hottenga<sup>8</sup>, Gonneke Willemsen<sup>8</sup>, Eco J.C. de Geus<sup>8</sup>, Mattias Lorentzon<sup>9</sup>, Huberta von Eller-Eberstein<sup>4</sup>, Paul Lips<sup>10</sup>, Natascha Schoor<sup>10</sup>, Victor Pop<sup>11</sup>, Jules de Keijzer<sup>11</sup>, Albert Hofman<sup>6</sup>, Yuri S. Aulchenko<sup>12,13</sup>, Ben A. Oostra<sup>12</sup>, Claes Ohlsson<sup>9</sup>, Dorret I. Boomsma<sup>8</sup>, Andre G. Uitterlinden<sup>1,6</sup>, Cornelia M. van Duijn<sup>12</sup>, Fernando Rivadeneira<sup>1,6</sup> and Manfred Kayser<sup>5\*</sup>

**De novo genotyping**

Genotypes for twelve SNPs were generated using Taqman Allelic discrimination (Applied Biosystems Inc., Foster City, CA, USA). Ten SNPs (rs10472828, rs4362677, rs1552590, rs8009692, rs16970909, rs139909, rs6717918, rs5757949, rs12894275 and rs10898392) were available at [www.appliedbiosystems.com](http://www.appliedbiosystems.com) as pre-designed assays (C\_\_1237975\_10, C\_26146185\_10, C\_\_1182137\_10, C\_31535030\_10, C\_33719154\_10, C\_\_\_\_13406\_10, C\_\_207953\_10, C\_\_2487571\_20, C\_31068339\_10 and C\_31327595\_10). The other two SNPs, rs2804845 and rs9522262, were custom assays ordered at [www.appliedbiosystems.com](http://www.appliedbiosystems.com). (Rs2804845 forward primer TCTGGTAAGGGTGTGGAGGG, reverse primer TGCCTTAGGTAGAATTGGAACAAACA, probe 1 TTGTCCCAAGCTTAATAT, probe 2 TTTGTCCCAAGTTTAATAT. Rs9522262 forward primer TCTGAATGACAAGGACTCTGCTAGA, reverse primer GCTCAAATACATCGCTTGAAAGCAA, probe1 TTCTGAAGTTAGAGCTTC, probe2

TTCTGAAGTTACAGCTTC). The PCR reaction mixture included 1-2 ng of genomic DNA in a 2 µl volume and the following reagents: FAM and VIC probes (200 nM), primers (0.9 µM), 2x Taqman PCR master mix (Applied Biosystems Inc). PCR cycling reaction were performed in 384 wells PCR plates in an ABI 9700 PCR system (Applied Biosystems Inc) and consisted of initial denaturation for 15 minutes at 95° C, and 40 cycles with denaturation of 15 seconds at 95° C and annealing and extension for 60 seconds at 60° C. Results were analyzed by the LightCycler® 480II System using the LightCycler® 480 Software release 1.5.0 version 1.5.0.39 (Roche Diagnostics GmbH, Mannheim, Germany).

**Table 1.** Results in 10,074 Dutch and German samples for SNPs with reported height association in humans from the stage one meta-analysis.

| SNP        | CHR | POS       | Closest Gene | 2nd Closest Gene | Effect Allele | Other Allele | Mean Frequency | Effect  | SE     | P-value  |
|------------|-----|-----------|--------------|------------------|---------------|--------------|----------------|---------|--------|----------|
| rs11809207 | 1   | 26393727  | CATSPER4     | CNKSR1           | A             | G            | 0.1911         | 0.0346  | 0.019  | 0.06839  |
| rs6686842  | 1   | 41303458  | SCMH1        | SLFNL1           | T             | C            | 0.432          | 0.0302  | 0.0147 | 0.04044  |
| rs12735613 | 1   | 118685496 | SPAG17       | WDR3             | A             | G            | 0.2041         | -0.0452 | 0.0185 | 0.01478  |
| rs11205277 | 1   | 148159496 | SF3B4        | SV2A             | A             | G            | 0.5544         | -0.0376 | 0.0153 | 0.01381  |
| rs678962   | 1   | 170456512 | DNM3         | C1orf105         | T             | G            | 0.7875         | -0.0157 | 0.0185 | 0.3953   |
| rs2274432  | 1   | 182287568 | C1orf19      | GLT25D2          | A             | G            | 0.3656         | 0.0643  | 0.0156 | 3.87E-05 |
| rs1390401  | 1   | 225864573 | ZNF678       | JMJD4            | A             | G            | 0.8108         | 0.0373  | 0.0189 | 0.04891  |
| rs3791679  | 2   | 55950396  | EFEMP1       | PNPT1            | A             | G            | 0.7623         | 0.0203  | 0.0177 | 0.2517   |
| rs3791675  | 2   | 55964813  | EFEMP1       | PNPT1            | T             | C            | 0.239          | -0.0223 | 0.0178 | 0.2096   |
| rs6724465  | 2   | 219652090 | NHEJ1        | IHH              | A             | G            | 0.0971         | -0.0557 | 0.025  | 0.02577  |
| rs10935120 | 3   | 135715782 | CEP63        | ANAPC13          | A             | G            | 0.3112         | -0.0053 | 0.0162 | 0.742    |
| rs6440003  | 3   | 142576899 | ZBTB38       | ACPL2            | A             | G            | 0.4726         | 0.0634  | 0.0148 | 1.81E-05 |
| rs6763931  | 3   | 142585523 | ZBTB38       | ACPL2            | A             | G            | 0.4726         | 0.0627  | 0.0148 | 2.21E-05 |
| rs724016   | 3   | 142588260 | ZBTB38       | ACPL2            | A             | G            | 0.5275         | -0.0627 | 0.0148 | 2.22E-05 |
| rs16896068 | 4   | 17553938  | LCORL        | NCAPG            | A             | G            | 0.1433         | -0.0616 | 0.0211 | 0.003484 |
| rs6830062  | 4   | 17626828  | LCORL        | NCAPG            | T             | C            | 0.8565         | 0.0616  | 0.0211 | 0.003516 |
| rs1812175  | 4   | 145794294 | HHIP         | ANAPC10          | A             | G            | 0.1547         | -0.0537 | 0.0206 | 0.009014 |
| rs1492820  | 4   | 145869471 | HHIP         | ANAPC10          | A             | G            | 0.554          | 0.0426  | 0.0153 | 0.005266 |
| rs10472828 | 5   | 32924575  | C5orf23      | NPR3             | T             | C            | 0.4403         | -0.073  | 0.0148 | 8.10E-07 |
| rs12198986 | 6   | 7665058   | BMP6         | C6orf151         | A             | G            | 0.4738         | 0.018   | 0.0147 | 0.2223   |
| rs10946808 | 6   | 26341366  | HIST1H1D     | HIST1H4F         | A             | G            | 0.7216         | 0.0583  | 0.0167 | 0.000469 |
| rs2844479  | 6   | 31680935  | AIF1         | NCR3             | A             | C            | 0.6691         | 0.0032  | 0.0161 | 0.8438   |
| rs185819   | 6   | 32158045  | TNXB         | CREBL1           | T             | C            | 0.5108         | -0.0304 | 0.0148 | 0.03993  |
| rs1776897  | 6   | 34302989  | HMGA1        | C6orf1           | T             | G            | 0.9123         | -0.1259 | 0.0265 | 2.07E-06 |
| rs2814993  | 6   | 34726871  | C6orf106     | SPDEF            | A             | G            | 0.1508         | 0.0706  | 0.0208 | 0.000682 |
| rs4713858  | 6   | 35510763  | PPARD        | FANCE            | A             | G            | 0.1461         | -0.054  | 0.0211 | 0.01038  |
| rs314277   | 6   | 105514355 | LIN28B       | HACE1            | A             | C            | 0.1416         | 0.0352  | 0.022  | 0.1103   |

|            |    |           |          |          |   |   |        |         |        |          |
|------------|----|-----------|----------|----------|---|---|--------|---------|--------|----------|
| rs4549631  | 6  | 127008001 | C6orf173 | RSPO3    | T | C | 0.5088 | -0.049  | 0.0147 | 0.000863 |
| rs4896582  | 6  | 142745570 | GPR126   | VTA1     | A | G | 0.2914 | -0.0759 | 0.0164 | 3.56E-06 |
| rs3748069  | 6  | 142809326 | GPR126   | VTA1     | A | G | 0.7192 | 0.0744  | 0.0163 | 5.01E-06 |
| rs798544   | 7  | 2729628   | GNA12    | AMZ1     | T | C | 0.2814 | -0.0554 | 0.0163 | 0.000701 |
| rs849141   | 7  | 28151616  | JAZF1    | CREB5    | A | G | 0.3055 | 0.0631  | 0.0161 | 8.97E-05 |
| rs2040494  | 7  | 92094841  | CDK6     | FAM133B  | T | C | 0.5314 | 0.0772  | 0.0148 | 1.81E-07 |
| rs2282978  | 7  | 92102346  | CDK6     | FAM133B  | T | C | 0.6571 | -0.0656 | 0.0156 | 2.66E-05 |
| rs10958476 | 8  | 57258362  | PLAG1    | CHCHD7   | T | C | 0.7686 | -0.036  | 0.0181 | 0.04642  |
| rs9650315  | 8  | 57318152  | CHCHD7   | PLAG1    | T | G | 0.1205 | -0.1006 | 0.0239 | 2.64E-05 |
| rs7846385  | 8  | 78322734  | PXMP3    | ZFH4     | T | C | 0.7056 | -0.0397 | 0.0163 | 0.015    |
| rs10512248 | 9  | 97299524  | PTCH1    | FANCC    | T | G | 0.6659 | -0.0328 | 0.0161 | 0.04165  |
| rs4743034  | 9  | 108672174 | ZNF462   | RAD23B   | A | G | 0.2342 | -0.0024 | 0.0174 | 0.8902   |
| rs1042725  | 12 | 64644614  | HMG2A    | C12orf31 | T | C | 0.4813 | -0.0594 | 0.0148 | 6.28E-05 |
| rs8756     | 12 | 64646019  | HMG2A    | C12orf31 | A | C | 0.4997 | -0.0595 | 0.0148 | 6.00E-05 |
| rs11107116 | 12 | 92502635  | SOCS2    | MRPL42   | T | G | 0.2334 | 0.048   | 0.0173 | 0.005645 |
| rs3116602  | 13 | 50009356  | DLEU7    | RNASEH2B | T | G | 0.8139 | 0.1152  | 0.0193 | 2.32E-09 |
| rs7153027  | 14 | 91496975  | TRIP11   | FBLN5    | A | C | 0.5705 | -0.0179 | 0.0148 | 0.2268   |
| rs8007661  | 14 | 91529711  | TRIP11   | FBLN5    | T | C | 0.3902 | 0.0327  | 0.016  | 0.04124  |
| rs2562784  | 15 | 82077496  | SH3GL3   | ADAMTSL3 | A | G | 0.785  | -0.0301 | 0.0182 | 0.09693  |
| rs10906982 | 15 | 82359162  | ADAMTSL3 | SH3GL3   | A | T | 0.5194 | 0.0437  | 0.0146 | 0.002851 |
| rs8041863  | 15 | 87160693  | ACAN     | HAPLN3   | A | T | 0.4557 | 0.0205  | 0.0155 | 0.1867   |
| rs4533267  | 15 | 98603794  | ADAMTSL3 | LASS3    | A | G | 0.2825 | 0.0291  | 0.0164 | 0.07607  |
| rs3760318  | 17 | 26271841  | CENTA2   | C17orf42 | A | G | 0.355  | -0.0641 | 0.0155 | 3.49E-05 |
| rs4794665  | 17 | 52205328  | C17orf67 | DGKE     | A | G | 0.5171 | 0.0284  | 0.0148 | 0.05391  |
| rs757608   | 17 | 56852059  | C17orf82 | TBX2     | A | G | 0.3424 | 0.0462  | 0.0157 | 0.00317  |
| rs4800148  | 18 | 18978326  | CABLES1  | RBBP8    | A | G | 0.8083 | 0.0859  | 0.019  | 5.91E-06 |
| rs8099594  | 18 | 45245158  | DYM      | C18orf32 | A | G | 0.6635 | 0.0264  | 0.0161 | 0.1019   |
| rs12986413 | 19 | 2121954   | DOT1L    | AP3D1    | A | T | 0.5218 | -0.0268 | 0.0148 | 0.07117  |
| rs967417   | 20 | 6568893   | BMP2     | C20orf42 | A | G | 0.4523 | -0.0264 | 0.0148 | 0.07423  |
| rs6060369  | 20 | 33370575  | UQCC     | FAM83C   | T | C | 0.6019 | -0.0653 | 0.0154 | 2.18E-05 |

**Table 2.** Results of 12 SNPs representing new putative height loci from the stage one meta-analysis in 6912 Dutch and Swedish individuals of the stage two meta-analysis and in the combined stage one and stage two meta-analysis (n=16,986)

| SNP        | CHR | POS       | Closest Gene | 2nd Closest Gene | Effect Allele | Other Allele | Stage one data P-value | Stage two data P-value | Combined data P-value |
|------------|-----|-----------|--------------|------------------|---------------|--------------|------------------------|------------------------|-----------------------|
| rs6717918  | 2   | 232863354 | DIS3L2       | ALPP             | T             | C            | 4.46E-06               | 0.0001469              | 3.40E-09              |
| rs139909   | 22  | 39027527  | TNRC6B       | ADSL             | T             | C            | 4.53E-07               | 0.02242                | 1.78E-07              |
| rs10472828 | 5   | 32924575  | C5orf23      | NPR3             | T             | C            | 8.13E-07               | 0.02055                | 3.40E-07              |
| rs10898392 | 11  | 84842399  | TMEM126B     | TMEM126A         | T             | G            | 4.16E-06               | 0.04063                | 2.78E-06              |
| rs5757949  | 22  | 39150097  | SGSM3        | MKL1             | T             | C            | 2.02E-06               | 0.07042                | 3.94E-06              |
| rs12894275 | 14  | 102971177 | MARK3        | CKB              | A             | G            | 3.21E-06               | 0.2071                 | 3.74E-05              |
| rs16970909 | 17  | 73702089  | AFMID        | TK1              | T             | G            | 1.07E-07               | 0.66                   | 7.36E-05              |
| rs4362677  | 3   | 159150051 | SHOX2        | RSRC1            | A             | G            | 2.06E-06               | 0.4977                 | 0.0001763             |
| rs2804845  | 10  | 36182751  | FZD8         | CX40.1           | T             | C            | 4.92E-06               | 0.9404                 | 0.001608              |
| rs1552590  | 2   | 18451268  | RDH14        | NT5C1B           | T             | C            | 6.73E-07               | 0.3352                 | 0.003004              |
| rs9522262  | 13  | 110984284 | C13orf16     | ARHGEF7          | C             | G            | 3.52E-06               | 0.3186                 | 0.01459               |
| rs8009692  | 14  | 72364752  | DPF3         | WDR21A           | T             | C            | 3.30E-06               | 0.1132                 | 0.03429               |

**Table 3.** Sex and age adjusted effect sizes (with standard errors) in cohort specific height standard deviations for two SNPs near *NPPC* associated with height

| SNP (Effective allele) | Stage One Meta-analysis |                  |                  |                  | Stage Two Meta-analysis |                  |                  |                | Gudbjartsson et al. <sup>1</sup> (Suggestive signals) |                  |                    | Overall combined Meta-analysis |                       |
|------------------------|-------------------------|------------------|------------------|------------------|-------------------------|------------------|------------------|----------------|-------------------------------------------------------|------------------|--------------------|--------------------------------|-----------------------|
|                        | RS-I                    | RS-II            | ERF              | PopGen-KIEL      | EPOS                    | LASA             | NTR/NESDA        | GOOD           | Iceland                                               | Netherlands      | European Americans | Beta (SE)                      | P-value               |
| rs6717918 (T)          | 0.076<br>(0.024)        | 0.116<br>(0.039) | 0.088<br>(0.067) | 0.067<br>(0.057) | 0.031<br>(0.040)        | 0.050<br>(0.061) | 0.068<br>(0.023) | 0.14<br>(0.05) | NA                                                    | NA               | NA                 | 0.076<br>(0.012)               | 3.4×10 <sup>-9</sup>  |
| rs6718438 (T)          | 0.077<br>(0.024)        | 0.117<br>(0.040) | 0.098<br>(0.066) | 0.032<br>(0.058) | NA                      | NA               | 0.071<br>(0.023) | 0.13<br>(0.05) | 0.041<br>(0.012)                                      | 0.073<br>(0.035) | 0.068<br>(0.052)   | 0.058<br>(0.009)               | 8.4×10 <sup>-12</sup> |

<sup>1</sup> Gudbjartsson *et al.* (2008) *Nat. Genet.*, **40**, 609-615.

**Table 4.** SNP selection criteria and genotype imputation parameters used

| Genotyping       |                           |                     | SNP Inclusion criteria |           |                    |               |                   | Association          |          |                            |      |               |
|------------------|---------------------------|---------------------|------------------------|-----------|--------------------|---------------|-------------------|----------------------|----------|----------------------------|------|---------------|
| Study            | Platform Chip(s)          | Calling Algorithm   | MAF                    | Call Rate | P-test HWE         | Included SNPs | Imputation Method | Total # imputed SNPs | Software | Imputation Quality metric  | MAF  | Included SNPs |
| <b>RS-I</b>      | Illumina HumanHap 550     | Beadstudio Genecall | ≥ 1%                   | ≥ 98%     | ≥ 10 <sup>-6</sup> | 512349        | MACH              | 2,543,887            | MACH2QTL | (O/E)σ <sup>2</sup> ≥ 0.05 | ≥ 5% | 2,170,858     |
| <b>RS-II</b>     | Illumina HumanHap 550 Duo | Beadstudio Genecall | ≥ 1%                   | ≥ 98%     | ≥ 10 <sup>-6</sup> | 495,478       | MACH              | 2,543,835            | MACH2QTL | (O/E)σ <sup>2</sup> ≥ 0.05 | ≥ 5% | 2,169,897     |
| <b>ERF</b>       | Illumina HumanHap 300     | Beadstudio Genecall | ≥ 1%                   | ≥ 98%     | ≥ 10 <sup>-6</sup> | 305,093       | MACH              | 2,543,887            | ProABEL  | (O/E)σ <sup>2</sup> ≥ 0.05 | ≥ 5% | 2,145,565     |
| <b>KIEL</b>      | Affymetrix 500K GeneChip  | BRLMM               | ≥ 1%                   | ≥ 97%     | ≥ 10 <sup>-6</sup> | 378,163       | MACH              | 2,543,835            | MACH2QTL | (O/E)σ <sup>2</sup> ≥ 0.05 | ≥ 5% | 2,168,132     |
| <b>NTR-NESDA</b> | Perlegen 600K             | Perlegen Propriety  | ≥ 1%                   | ≥ 95%     | ≥ 10 <sup>-5</sup> | 495,478       | IMPUTE            | 2,543,887            | SNPTEST  | Proper_info ≥ 0.4          | ≥ 5% | 12            |
| <b>GOOD</b>      | Illumina HumanHap 610     | Beadstudio Genecall | ≥ 1%                   | ≥ 98%     | ≥ 10 <sup>-6</sup> | 554,085       | MACH              | 2,543,887            | MACH2QTL | (O/E)σ <sup>2</sup> ≥ 0.05 | ≥ 5% | 12            |
| <b>EPOS</b>      | TaqMan Assays             | ABI Taqman 7900HT   | ≥ 1%                   | ≥ 90%     | ≥ 10 <sup>-4</sup> | 12            | NA                | NA                   | PLINK    | NA                         | ≥ 5% | 12            |
| <b>LASA</b>      | TaqMan Assays             | ABI Taqman 7900HT   | ≥ 1%                   | ≥ 90%     | ≥ 10 <sup>-4</sup> | 12            | NA                | NA                   | PLINK    | NA                         | ≥ 5% | 12            |

## Legends to Supplementary Figures

Figure 1. Regional association plot for the loci near the *TNRC6B* gene. P-values are results from the stage one meta-analysis. The color scheme of SNPs in are red for strong LD ( $r^2 \geq 0.8$ ), orange for moderate LD ( $r^2 \geq 0.5$  and  $< 0.8$ ), yellow for weak LD ( $r^2 \geq 0.2$  and  $< 0.5$ ) and white for limited or no LD ( $r^2 < 0.2$ ). Blue peaks indicate recombination rates.

Figure 2. Regional association plot for the loci near the *NPR3* gene. P-values are results from the stage one meta-analysis. The color scheme of SNPs in are red for strong LD ( $r^2 \geq 0.8$ ), orange for moderate LD ( $r^2 \geq 0.5$  and  $< 0.8$ ), yellow for weak LD ( $r^2 \geq 0.2$  and  $< 0.5$ ) and white for limited or no LD ( $r^2 < 0.2$ ). Blue peaks indicate recombination rates.

Figure 3. Regional association plot for the loci with GWS near the *NPPC* gene P-values are results from the combined stage one and stage two meta-analysis together with data from Gudbjartsson et al. (2008) (only 9 SNPs available). The color scheme of SNPs in are red for strong LD ( $r^2 \geq 0.8$ ), orange for moderate LD ( $r^2 \geq 0.5$  and  $< 0.8$ ), yellow for weak LD ( $r^2 \geq 0.2$  and  $< 0.5$ ) and white for limited or no LD ( $r^2 < 0.2$ ). Blue peaks indicate recombination rates.



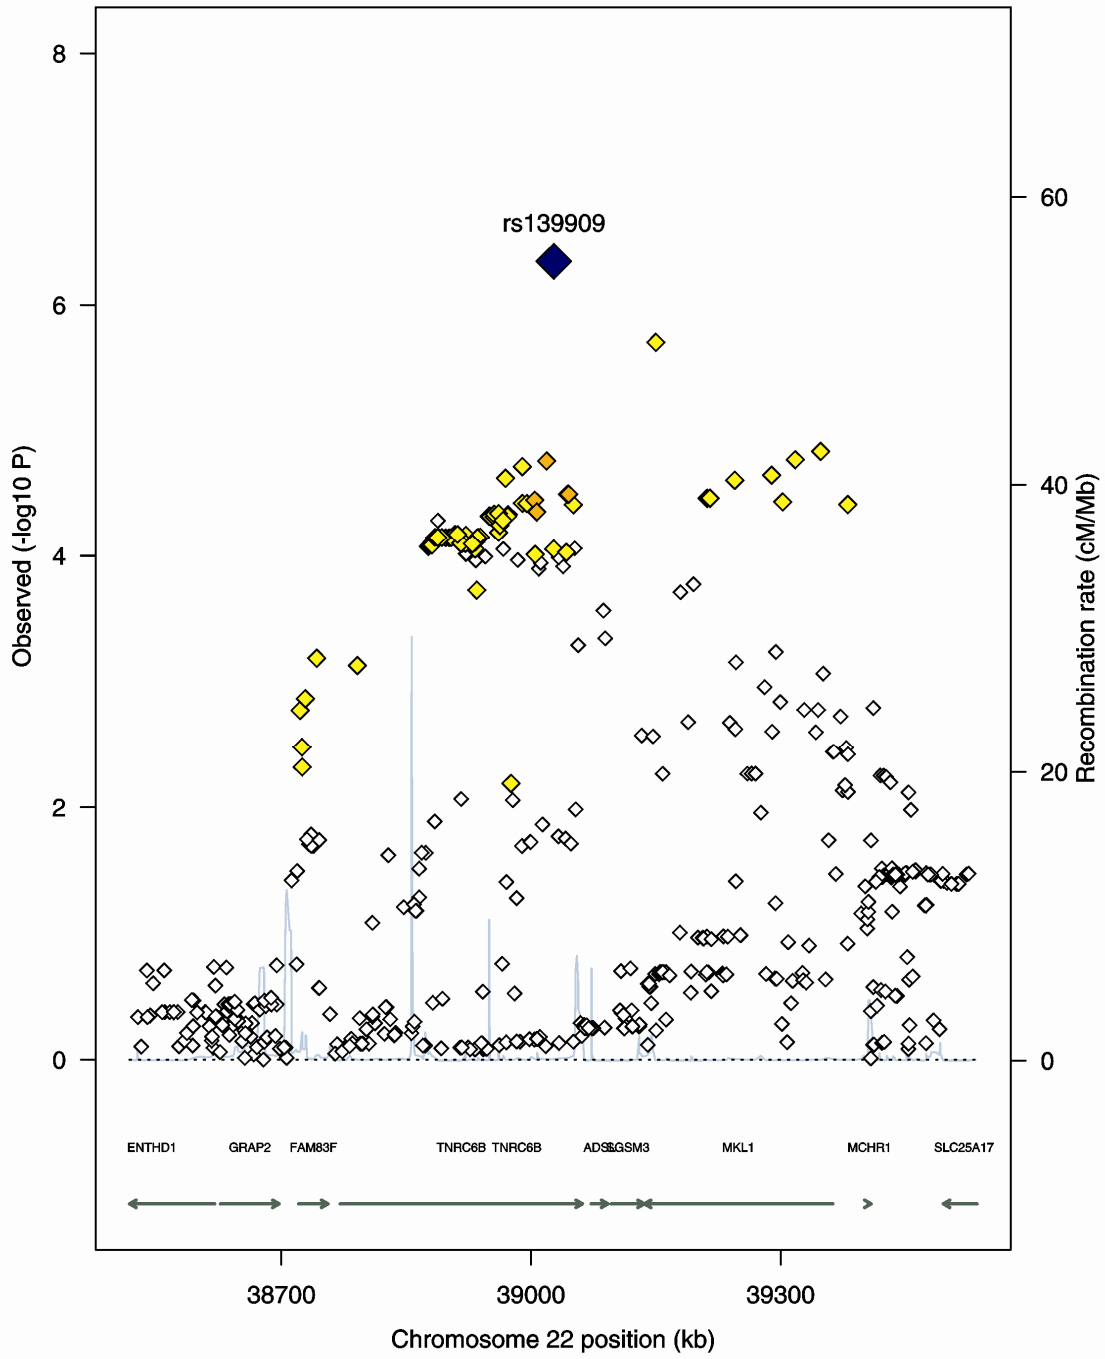

Figure 1

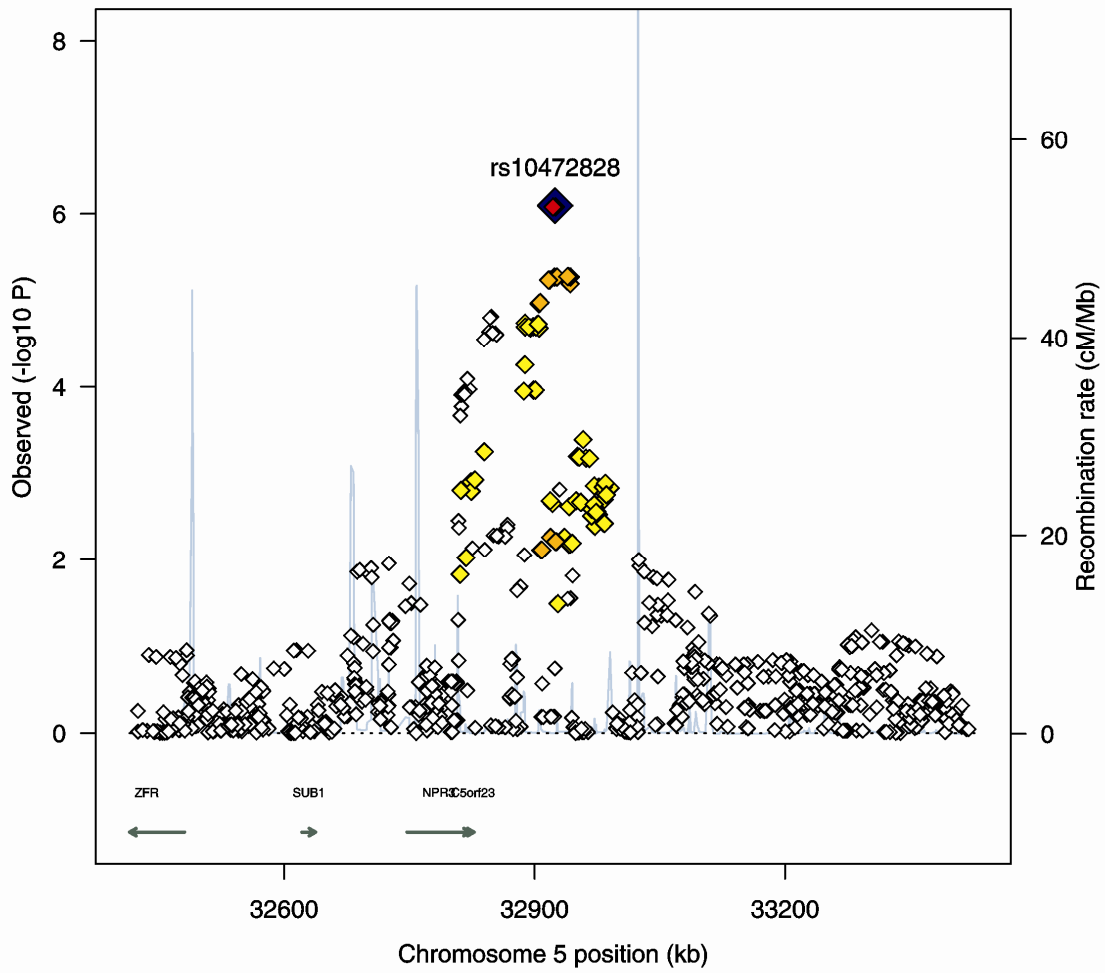

Figure 2

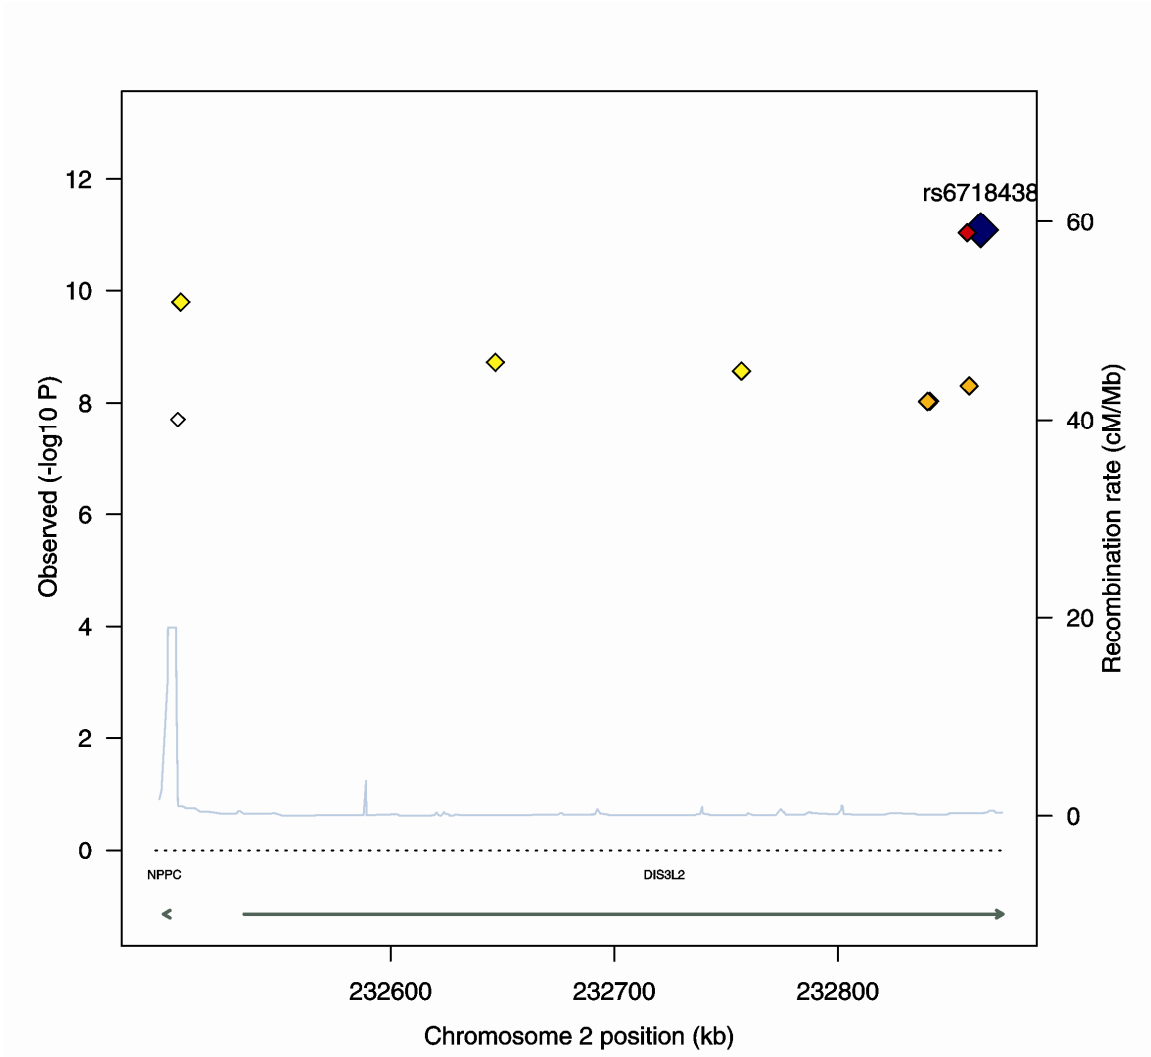

Figure 3
